# Supplementary material for: Modifiable dementia risk factors associated with objective and subjective cognition
Source: PubMed Central journal article supplement (PMC11567824; doi:10.1002/alz.13885), 2024-10-09
Supplement: ALZ-20-7437-s002.pdf [file ALZ-20-7437-s002.pdf]

# Supplement

## Table of Contents

|                                                                                               |           |
|-----------------------------------------------------------------------------------------------|-----------|
| <b><i>S1: Age distribution in the final sample</i></b> .....                                  | <b>2</b>  |
| <i>Figure S1</i> .....                                                                        | 2         |
| <b><i>S2: Sensitivity analysis excluding non-native speakers</i></b> .....                    | <b>3</b>  |
| <i>Figure S2</i> .....                                                                        | 3         |
| <b><i>S3: Validation of gamified cognitive measures</i></b> .....                             | <b>4</b>  |
| <b>S3A Memory Match and Star Racer</b> .....                                                  | <b>4</b>  |
| Method .....                                                                                  | 4         |
| <i>Figure S3</i> .....                                                                        | 7         |
| Results .....                                                                                 | 9         |
| <i>Figure S4</i> .....                                                                        | 11        |
| <i>Figure S5</i> .....                                                                        | 12        |
| <i>Figure S6</i> .....                                                                        | 13        |
| <b>S3B Cannon Blast</b> .....                                                                 | <b>14</b> |
| <i>Figure S7</i> .....                                                                        | 15        |
| <b><i>S4: Task structure of Memory Match</i></b> .....                                        | <b>16</b> |
| <i>Figure S8</i> .....                                                                        | 16        |
| <b><i>S5: Task structure of Star Racer</i></b> .....                                          | <b>17</b> |
| <i>Figure S9</i> .....                                                                        | 17        |
| <b><i>S6: Associations between risk factor measures</i></b> .....                             | <b>18</b> |
| <i>Figure S10</i> .....                                                                       | 18        |
| <b><i>S7: Results for non-cisgender participants</i></b> .....                                | <b>19</b> |
| <i>Figure S11</i> .....                                                                       | 19        |
| <b><i>S8: Comparison of effect magnitude for subjective vs. objective cognition</i></b> ..... | <b>20</b> |
| Table S1. ....                                                                                | 20        |
| <b><i>S9: Smoking history x age interaction</i></b> .....                                     | <b>21</b> |
| <i>Figure S12</i> .....                                                                       | 21        |
| <b><i>S10: Interactions between age and risk factors</i></b> .....                            | <b>22</b> |
| Table S2. ....                                                                                | 22        |
| <b><i>References</i></b> .....                                                                | <b>24</b> |

### S1: Age distribution in the final sample

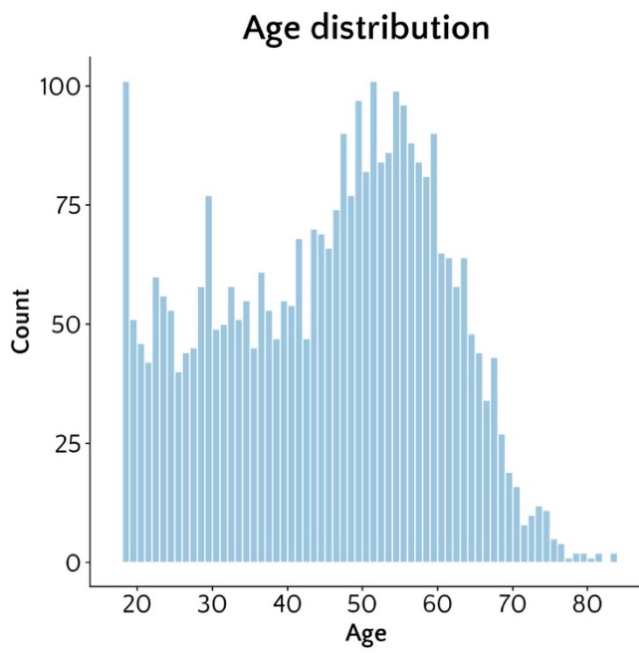

**Figure S1.** Age histogram showing the number of participants per years of age in the final sample (N = 3,342).

## S2: Sensitivity analysis excluding non-native speakers

We have replicated the main analyses of the paper in a subset of  $n = 2,996$  participants who reported having English as their first language. This analysis did not reveal a substantially different pattern of results, although the association between diabetes and working memory was rendered non-significant at  $P < .0038$  (see Figure S2 below), probably due to the reduction in sample size. Additionally, the association between history of stroke and binarized cognitive flexibility (panel C) was now significant, unlike in the full sample analyses. Overall, these results illustrate that the inclusion of non-native speakers did not have a substantial effect on the results.

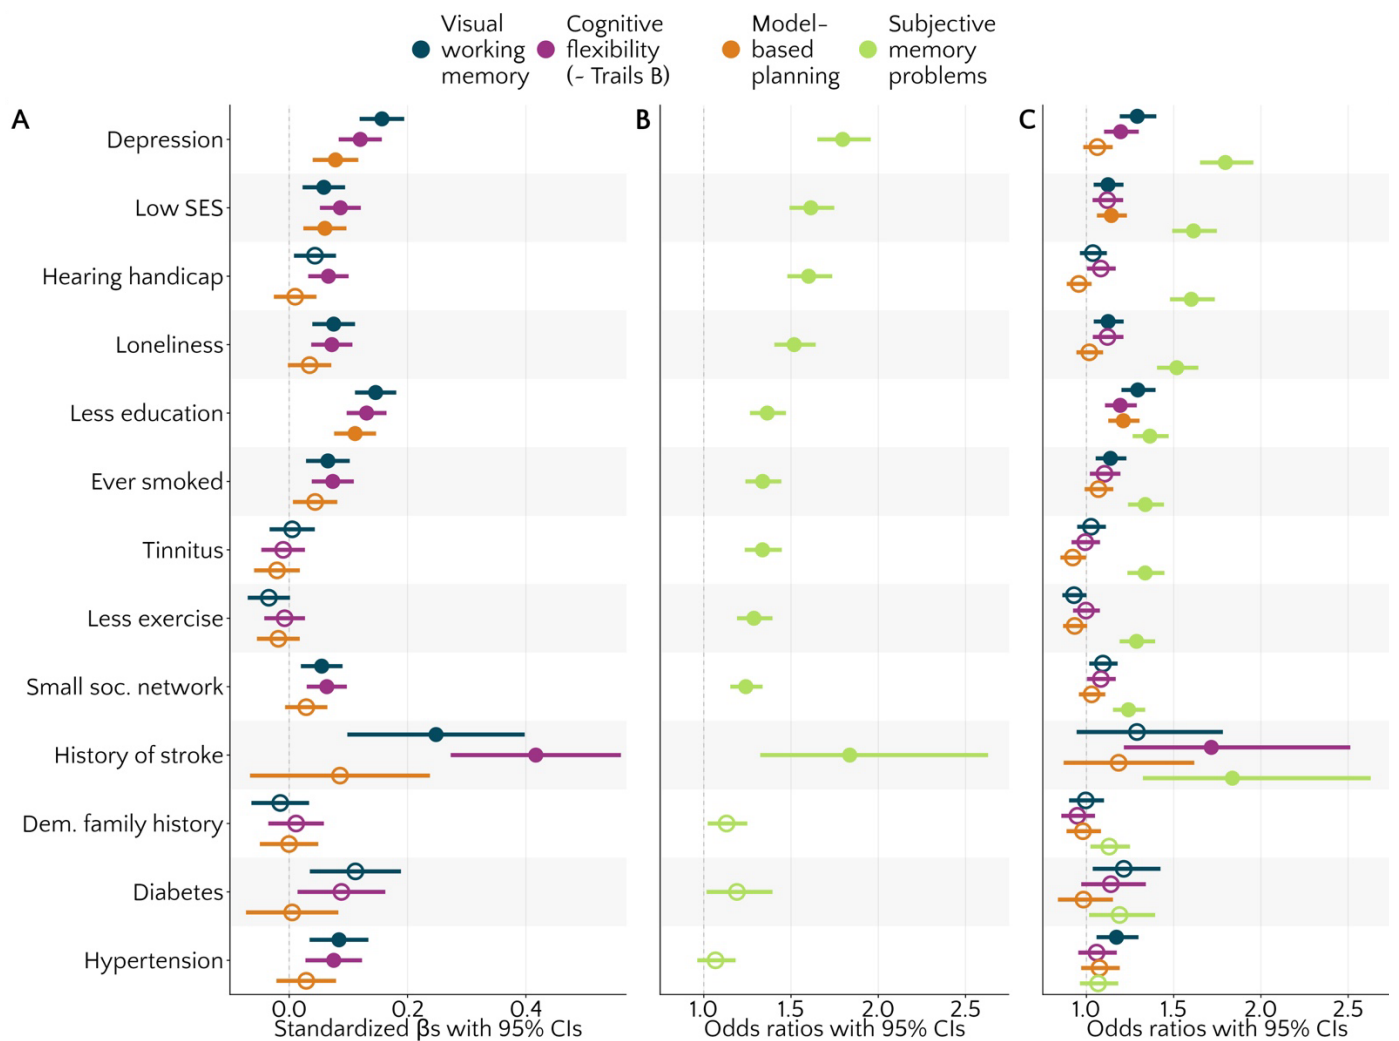

**Figure S2. Associations between cognitive measures and risk factors, controlling for age and gender, in the subset of native-speaking participants ( $n = 2,996$ ).** Filled circles represent values significant at  $P < .0038$ , i.e., after applying Bonferroni correction per dependent variable. Higher estimates indicate worse cognitive outcomes. Circles and lines represent (A) standardized beta estimates with 95% confidence intervals or (B–C) odds ratios with 95% confidence intervals. In (C), objective cognitive scores were binarized to enable direct comparison of odds ratios with subjective memory problems.

### S3: Validation of gamified cognitive measures

We developed gamified smartphone-based versions of three cognitive tests that have been linked, directly or indirectly, to incipient cognitive decline and Alzheimer’s dementia. In brief, compared to the traditional tests, our newly developed games take less time to complete, aim to be more engaging, and can be fully self-administered via smartphone while maintaining a standardized presentation of stimuli. A detailed validation of the task that assesses model-based planning ‘Cannon Blast’ has already been published<sup>1</sup> and the methodology and results are summarised briefly below. For the cognitive flexibility task (‘Star Racer’) and the visual short term memory task (‘Memory Match’), we describe their validation here. In each case, we compared the new tasks with their traditional counterparts in an in-lab study and further assessed the validity and reliability in a large sample crowdsourced via the Neureka app.

#### S3A Memory Match and Star Racer

##### Method

**Participants.** For both Memory Match and Star Racer, we conducted a separate in-lab validation study, in which paid participants completed the two games together, in addition to more traditional versions of these tasks (Visual Short-Term Memory Binding Task – VSMBT,<sup>2</sup> and Trail-Making Test – TMT,<sup>3</sup> respectively). We recruited a convenience sample at Trinity College Dublin, Ireland, through posters on campus and online advertisements and from the Greater Dublin area via online advertisements in the Dublin volunteer centre. Of the originally recruited  $N = 45$  participants,  $n = 35$  had complete data for both Memory Match and VSMBT and  $n = 41$  participants had complete data for both Star Racer and TMT. Further two participants were excluded from the Memory Match/VSMBT sub-sample – one due to colour-blindness and the other due to not passing a perceptual check (see Procedure, section Traditional binding task below). The final  $n = 33$  Memory Match/VSMBT participants were aged 18–46 ( $M = 24.7 \pm 7.1$ ) and consisted of 63 % female participants. The final  $n = 41$  Star Racer/TMT participants were aged 18–68 ( $M = 26.2 \pm 9.9$ ) and consisted of 56 % female participants.

Second, we used data crowdsourced from unpaid ‘citizen scientists’ (i.e., volunteer members of the general public) who have completed Memory Match or Star Racer within the ‘Risk Factors Science Challenge’ module in the Neureka app since the app’s release in June 2020 until January 2023. After removing incomplete datasets, participants who left and re-entered the app during gameplay, and Star Racer response times that exceeded cut-off times (i.e., over 100s on Star Racer A and over 300s on Star Racer B, see more in the Materials section below), the final samples consisted of  $N = 6,398$  (Memory Match), respective  $N = 5,986$  (Star Racer) participants. Participants were aged 18–85 ( $M = 45.2 \pm 14.7$  for Memory Match, respective  $M = 44.5 \pm 14.7$  for Star Racer). With regards to gender, 4,161 (65.0%) for Memory Match, respective 3,841 (64.2%) for Star Racer were cisgender female, 107 (1.7%), respective 108 (1.8%) were non-cisgender, and 15 (0.2%), respective 18 (0.3%) preferred not

42 to state their gender. The participants came from 74 (Memory Match), respective 73 (Star  
43 Racer) countries, with the United Kingdom, United States, Ireland, Canada, and Germany  
44 being the most prevalent. Additionally, a subset of  $n = 294$  (Memory Match), respective  $n =$   
45 67 (Star Racer) participants completed a part of the 'Free Play' module in the Neureka app  
46 that was comparable to the 'Risk Factors' version of each of the games, providing us with  
47 data for a test-retest reliability estimate.

48  
49

### ***Procedure.***

50 *Study 1 (in-lab validation study).* Participants were administered Memory Match, Star  
51 Racer, and both traditional tasks in semi-randomized order: Each gamified task and its  
52 traditional version were administered together in blocks but the order of tasks within blocks  
53 and the order of blocks were both randomized. Both Memory Match and Star Racer were  
54 administered on a Google Pixel 3a phone. After completing the tasks, participants provided  
55 their demographic data, then they were debriefed and reimbursed.

56

57 *Study 2 (citizen scientists).* Both Memory Match and Star Racer were included in the  
58 'Risk Factors Science Challenge' module in the Neureka app and administered remotely to  
59 volunteer citizen scientists alongside self-report lifestyle and health questionnaires. The Risk  
60 Factors challenge is further described in the main part of this paper. Importantly, the order of  
61 presentation of the tasks was randomized and completion of the entire challenge could be  
62 distributed across time. In the current analyses, we included the first complete take on each  
63 task (Memory Match /Star Racer) in the Risk Factors challenge. Additionally, modified  
64 versions of both Memory Match and Star Racer were available in the 'Free Play' section of  
65 the Neureka app as standalone games, where the participants could choose which difficulty  
66 level of each game they complete and how many times. We used performance on completed  
67 Free Play takes and compared them to Risk Factors takes to estimate test-retest reliability of  
68 each task. Both studies were approved by the Trinity College Dublin School of Psychology  
69 Ethics Committee and informed consent was obtained from all participants prior to  
70 participation.

71

72

### ***Materials.***

73 *Traditional binding task.* The Visual Short-Term Memory Binding Task (VSMBT) is a  
74 computer-based task that uses a change-detection paradigm to assess visual working memory  
75 binding (i.e. the ability to associate multiple features together in short-term memory), which  
76 seems to be specifically impaired early in Alzheimer's disease but not in normal ageing.<sup>2,4-6</sup>  
77 In our study, VSMBT was administered using E-Prime 2.0 Run Time.<sup>7</sup> Like Brockmole et.  
78 al,<sup>4</sup> we used an array of black shapes (non-binding condition) or coloured shapes (binding  
79 condition) as stimuli. The shapes on each trial were randomly selected out of a set of eight  
80 six-sided polygons and presented on light grey background. The colours in the binding  
81 condition were randomly selected from a set of eight non-primary colours. No shape or  
82 colour was repeated within any given array. On each trial, a study array was presented  
83 followed by a test array, whereby the participants had to recognize whether the items

84 presented in the test and study arrays were the ‘same’ or ‘different’ and to respond  
85 accordingly by a button press (see Figure S3 for a detailed overview of the task). On the  
86 ‘different’ trials, studied shapes were replaced by new ones (non-binding condition), or two  
87 shapes swapped colours (binding condition). Location of the stimuli changed randomly  
88 between study and test arrays to prevent participants from using location as a memory cue.  
89

90 The task in the current study consisted of four conditions, with two-item and three-  
91 item versions of both the non-binding and the binding condition. There were 16 ‘same’ trials  
92 and 16 ‘different’ trials in each condition, presented in random order, and so participants  
93 completed 128 trials in total. Conditions were blocked: All participants first completed a two-  
94 item block of the non-binding condition, followed by a two-item block of the binding  
95 condition. They were then shown two blocks of three-item displays, with half of participants  
96 receiving the non-binding block first. The order of conditions (non-binding or binding first)  
97 for the three-item blocks alternated between participants. To ensure that the participants  
98 understood the task, the examiner showed them sample arrays, gave an oral explanation of  
99 the task, and asked for their response (‘same’ or ‘different’), before each block started.  
100

101 Between the two-item and three-item blocks of trials, participants additionally  
102 completed a brief perceptual task to check if their performance could be confounded by  
103 perceptual problems independent of memory. In each of the 10 trials of this perceptual task,  
104 participants were presented with two sets of three coloured shapes, which appeared  
105 simultaneously on-screen separated by a horizontal line. Participants were asked to indicate  
106 whether the two sets of shapes were the same or different, with five ‘same’ and five  
107 ‘different’ trials being ordered randomly across task. Scoring under 90% correct (less than 9  
108 out of 10 trials) was considered indicative of perceptual binding difficulties, resulting in one  
109 participant being excluded from the study.  
110

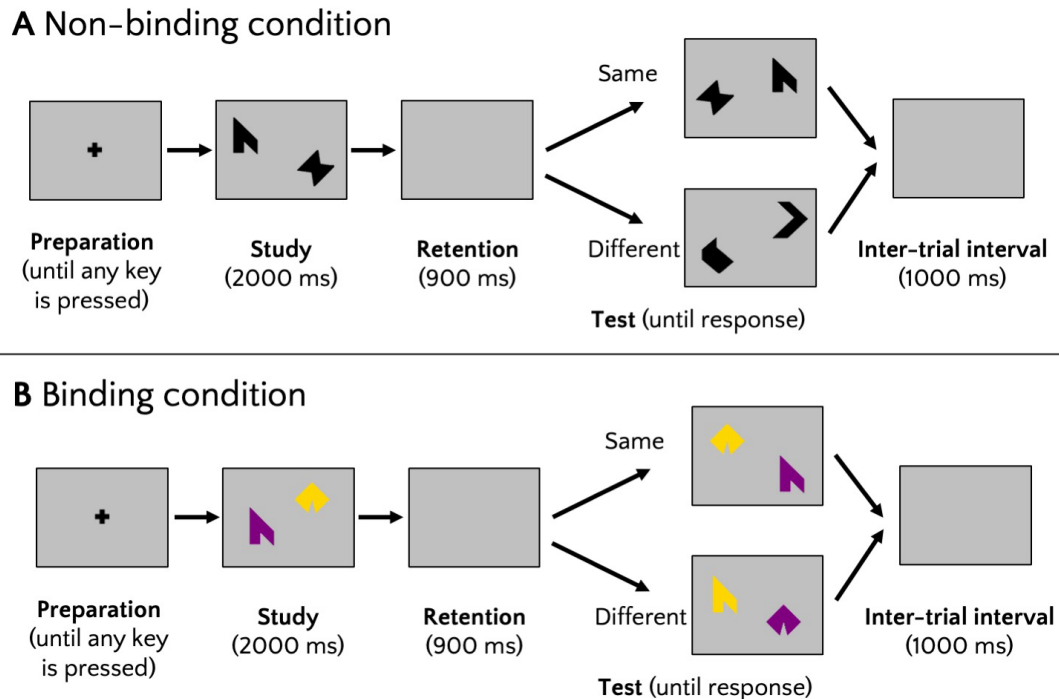

111 **Figure S3. Traditional binding task (VSMBT), two-item version. A: The non-binding condition, in which**  
 112 **participants only need to memorise the shapes. B: The binding condition, in which participants need to**  
 113 **memorise shape-colour combinations. Note that in the ‘different’ trials, test set shapes are the same as in**  
 114 **the study set but swap colours.**  
 115

116  
 117 *Memory Match.* Besides the Risk Factors challenge (see main paper for more  
 118 information), Memory Match was also available in a modified ‘Free Play’ version. In this  
 119 version of the task within a separate section of the app, each of the difficulty levels was  
 120 available for playing individually. The task setup within each difficulty level was otherwise  
 121 identical. Unlike in the Risk Factors version, the self-paced task instructions (Supplement S4,  
 122 Figure S8A) were not presented automatically at the start of each gameplay, but they were  
 123 available for re-visiting individually within the ‘Free Play’ section.

124  
 125 *Traditional trail-making test.* The Trail Making Test (TMT) is a pen-and-paper  
 126 cognitive test, commonly used to detect neuropsychological impairment both in research and  
 127 clinical settings.<sup>3</sup> It consists of two parts that require the participant to connect 25 labelled  
 128 circles in numerical order (TMT A) or numerical and alphabetical order, alternating between  
 129 numbers and letters (i.e., 1–A–2–B–etc.; TMT B). The main variable of interest is the total  
 130 time to complete each part. TMT A taps mainly into processing speed and visual search,  
 131 whereas TMT B taps mainly into cognitive flexibility and executive function.<sup>3</sup> We  
 132 administered the traditional trail-making test according to standard instructions<sup>3</sup> – including  
 133 two practice runs and both A and B versions.

134  
 135 *Star Racer.* Participants can play Star Racer within the Risk Factors challenge or in a  
 136 ‘Free Play’ section of the app. In Risk Factors, where most participants first encounter the  
 137 game, it begins with a set of self-paced tutorial screens and practice runs (see Supplement S5,  
 138 Figure S9A). In this tutorial, participants receive static screens illustrating the task and then

139 complete a short practice round of trails A and B, with just eight stars. Once the participants  
140 tap ‘Start Game’, this is followed by six runs of the main task (see Supplement S5, Figure  
141 S9B). Of note, the first two runs of A and B mirror closely the original layout of A and B  
142 forms and are as such are referred to as “hard-coded”. The remaining 4 runs have randomly  
143 generated star locations (i.e., “random-coded”), thus setting up the task for repeated  
144 administration with reduced learning effects.  
145

146 In Free Play, there are three difficulty levels that participants can choose from – two  
147 easier levels with fewer stars (‘Easy’ with 8 stars and ‘Medium’ with 15 stars) and the third  
148 one with the same number of stars as in the Risk Factors version of Star Racer (‘Hard’, 25  
149 stars). The ‘Hard’ level consists of one run of each version A or B, with randomly generated  
150 star locations. Unlike in Risk Factors, the task instructions and practice runs are not presented  
151 automatically at the start of gameplay, but they are available for re-visiting within the ‘Free  
152 Play’ section.  
153

154 In both the Risk Factors and the Free Play version of the task, we applied exclusion  
155 criteria as specified in the main paper to deal with inattentive responders: We excluded all  
156 runs of version A that exceeded 100 seconds, and all runs of version B that exceeded 300  
157 seconds. Performance was calculated as the mean time to complete the remaining runs for  
158 each participant. These cut-offs were based on approximately double the median completion  
159 times for the oldest and least educated group in a normative study of the traditional task.<sup>8</sup>  
160

## 161 *Analyses.*

162 *Validity.* In the in-lab validation study sample, we estimated convergent validity by  
163 calculating correlations of each of the new tasks and its different conditions with more  
164 traditional versions. We also ran an ANOVA with Tukey’s post-hoc tests (Memory Match)  
165 and a series of two-sample t-tests (Star Racer) as applicable across both samples (i.e., in-lab  
166 and citizen scientist) to compare each task’s conditions among themselves and establish the  
167 extent to which each task behaves similarly to its traditional version. To assess the ceiling  
168 effects in Memory Match and VSMBT, we used a paired t-test to compare mean performance  
169 and a Levene’s test to compare variability of both tasks in the in-lab sample.  
170

171 *Internal consistency.* Split-half reliability of Memory Match was calculated using the  
172 Pearson correlation across odd and even trials in the large Citizen Science sample. To  
173 generate a comparison, we also calculated split half of the VSMBT from the in-lab validation  
174 study sample. Due to the task version we used, we did not have access to trial level data (only  
175 block-level), and so split half was calculated as the correlation of mean accuracy across the  
176 trials with 2 stimuli to remember vs those with 3 stimuli to remember. To adjust for test  
177 length effects, Spearman–Brown formula was applied to the resultant correlations. For Star  
178 Racer, internal consistency was calculated for A and B versions separately as Cronbach’s  $\alpha$  of  
179 the three runs in each version, using the data from the citizen scientists. We did not have a  
180 comparator for the traditional task, as it is a paper and pen assessment with only one measure



181 of total time to complete. Additionally, we computed bootstrap 95% confidence intervals for  
182 Cronbach's  $\alpha$  based on 1000 samples.

183 *Test-retest reliability.* We calculated test-retest reliability as a Pearson correlation  
184 between overall performance on Memory Match and Star Racer (separately for the A and B  
185 versions) in the Risk Factors section and the equivalent subset of Free Play data. We only  
186 included participants who completed the Risk Factors and the Free Play versions of the  
187 games within 30 days from each other. The median distance between assessments was 1 day  
188 for both Memory Match and Star Racer. As the Free Play version of each game had fewer  
189 trials/runs compared to the full Risk Factors version and participants could complete the  
190 various difficulty levels in whatever order they preferred, we only used data from participants  
191 who completed trials/runs in a number and difficulty that was equivalent to the Risk Factors  
192 version of each of the games, and only if they completed all these equivalent Free Play  
193 trials/runs within the same day. For Memory Match, overall accuracy (i.e., mean proportion  
194 correct) of each participant was calculated by averaging the proportion correct from their first  
195 attempt at each difficulty level in the Free Play. For Star Racer, mean completion time of each  
196 participant was calculated by averaging completion time on their first 3 attempts at the 'Hard'  
197 difficulty level in the Free Play section.

198  
199

## Results

200 *Memory Match.* We found that as expected, the overall accuracy on Memory Match  
201 decreased as memory load (i.e., number of memorised items) increased ( $F(2) = 7729.17$ ,  $P$   
202  $< .001$ ,  $\eta^2 = .15$ ; see Figure S4A). Performance on Memory Match also differed by condition  
203 ( $F(1) = 1476.38$ ,  $P < .001$ ,  $\eta^2 = .02$ ; see Figure S4B) and trial type ( $F(1) = 52677.82$ ,  $P$   
204  $< .001$ ,  $\eta^2 = .38$ ), whereby it decreased as task conditions became more complex (i.e.,  
205 abstract shapes  $<$  nameable letters, binding  $<$  non-binding; all  $P < .001$ ), mirroring the effects  
206 seen in previous VSMBT literature. Importantly, we were successful in reducing ceiling  
207 effects; the mean overall performance was significantly lower ( $t(32) = 7.77$ ;  $P < .001$ ) and  
208 variability higher ( $F(1, 64) = 16.38$ ;  $P < .001$ ) on Memory Match ( $M = .83 \pm 0.08$ ) than on  
209 VSMBT ( $M = .94 \pm .04$ ). Given this important enhancement to the task (see ranges of scores  
210 in Figure S4D, S4E), we did not expect perfect cross-task convergence. In the in-lab sample,  
211 the correlation between overall accuracy on Memory Match and VSMBT was  $r(31) = .40$ ;  $P$   
212  $= 0.023$  (Figure S4D). For Memory Match, the test-retest reliability of overall accuracy was  
213 assessed in those citizen scientists who played the game more than once and we found  
214 moderate reliability,  $r(292) = .63$ ,  $P < .001$ . The split-half reliability of overall Memory  
215 Match accuracy was assessed in the larger sample who completed the game once, giving  $r$   
216  $(6396) = .64$ ,  $P < .001$  ( $r = .78$  after adjusting for test-length effects using the Spearman-  
217 Brown formula), suggesting an acceptable internal consistency. These reliability estimates are  
218 comparable to the traditional version of the task where the correlation across the two levels of  
219 the task was  $r(31) = .60$  ( $r = .75$  after adjusting for test-length effects using the Spearman-  
220 Brown formula).

221

222 One point of departure across the traditional and this new smartphone test concerned  
223 the binding effect<sup>4</sup> – while we replicated the overall binding effect (i.e., mean accuracy lower

224 on binding vs non-binding trials; Figure S4B) on aggregated performance, we noted that this  
225 was driven by the ‘letters’ trials in Memory Match. In the ‘shapes’ trials, participants showed  
226 no difference (in-lab sample) or even performed slightly worse (citizen scientists) on the non-  
227 binding than the binding condition (Figure S4C). This was reflected in a significant  
228 interaction effect of condition x trial type in citizen scientists ( $F(1) = 2936.44, P < .001,$   
229  $\eta^2 = .03$ ). We suspect this is a feature of the use of a grid-search design instead of the  
230 traditional task’s forced-choice paradigm where participants have to categorize presented  
231 symbols as ‘same/different’. Because the target shapes are particularly difficult to identify  
232 within a grid of many other abstract shapes, on binding trials, it is possible participants  
233 utilized colour information to narrow down the number of shapes they had to consider and  
234 boost performance that way (see Figure S5). We found a comparable pattern of results in the  
235 smaller, in-lab sample (see Figure S4A–C). Overall, though interesting, as we focus on  
236 overall working memory performance, these details do not affect the key interpretation of our  
237 dependent measure.

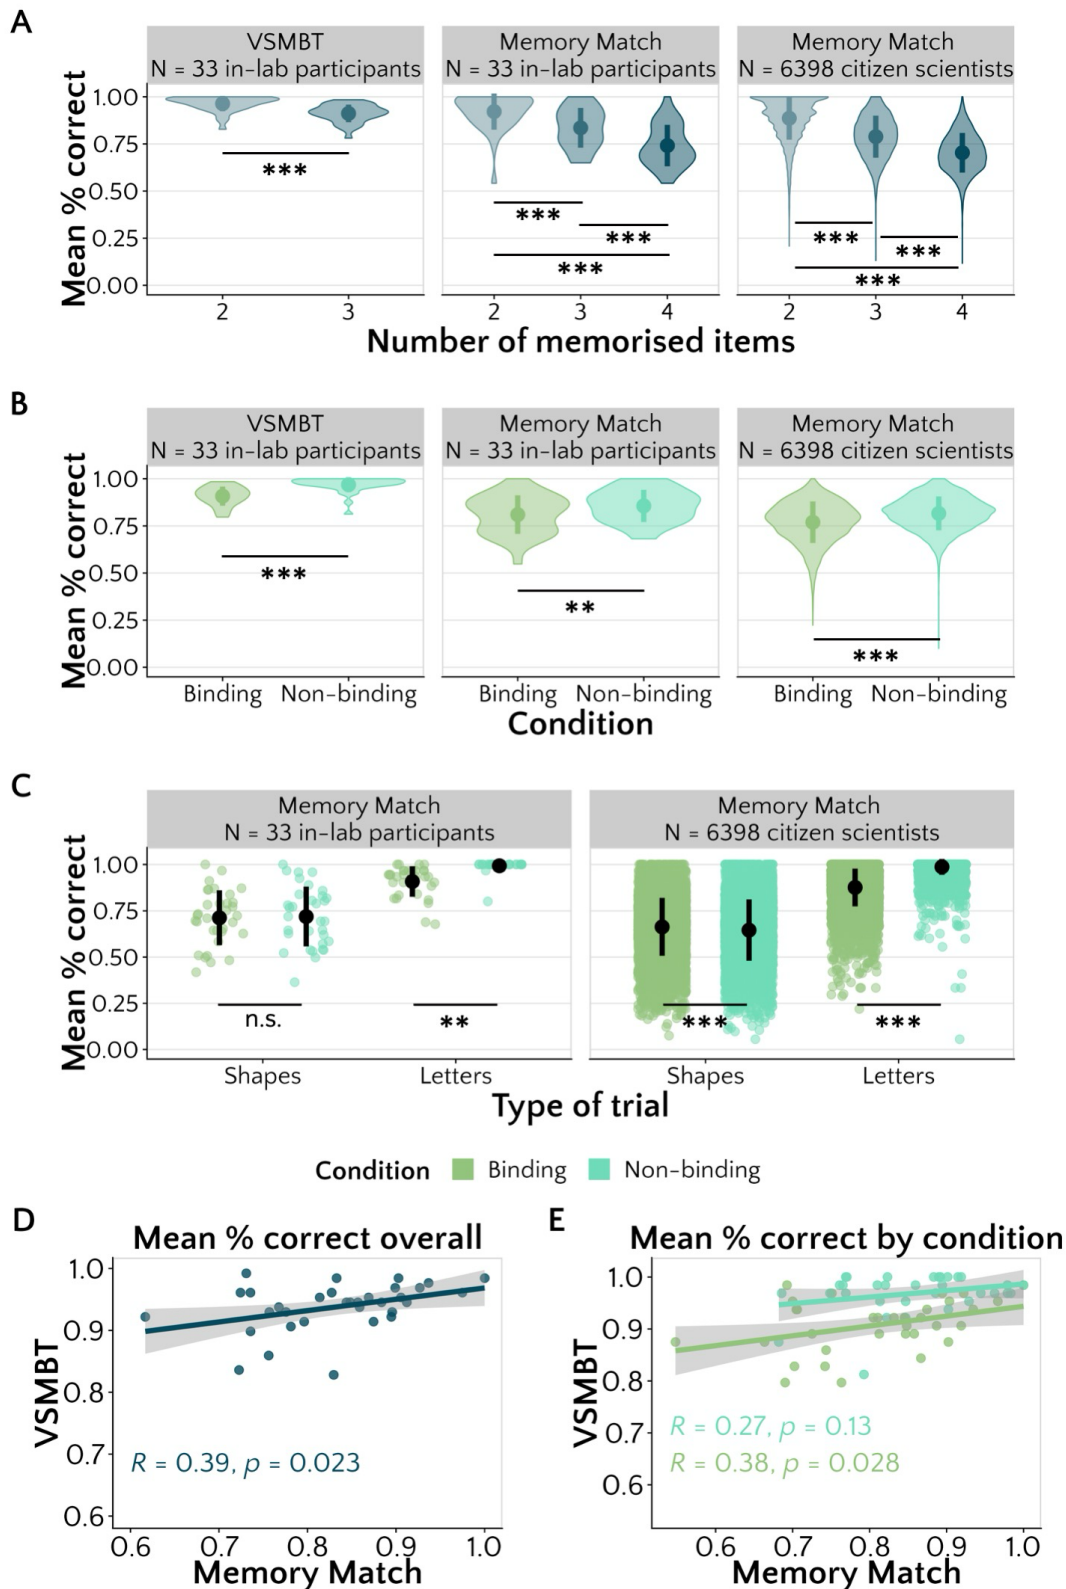

238  
 239  
 240  
 241  
 242  
 243  
 244

**Figure S4.** A: Mean percentage correct in VSMBT and Memory Match, split by difficulty level (i.e., number of memorised items). B: Mean percentage correct in VSMBT and Memory Match, split by condition (i.e., binding/non-binding). C: Mean percentage correct in VSMBT and Memory Match, split by condition and trial type (i.e., shapes/letters). D: Correlation of mean percentage correct (i.e., overall accuracy) in VSMBT and in Memory Match. E: Correlation of mean percentage correct in VSMBT and in Memory Match, split by condition.

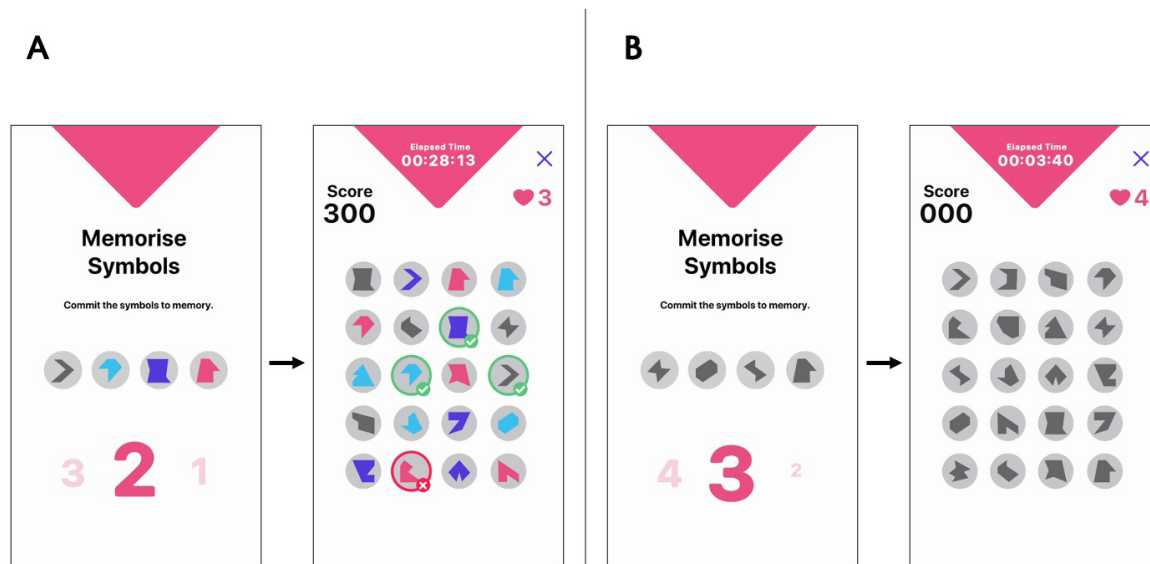

245  
 246 **Figure S5.** Comparison of the binding (A) and non-binding (B) condition of a shapes trial. The colour in  
 247 the binding condition can serve as guidance for participants, whereby in comparison to the non-binding  
 248 task, they have a reduced set of shapes of each colour to choose from.  
 249

250 **Star Racer.** Similarly to the traditional TMT ( $t(40) = -12.66, P < .001$ ), completion times in  
 251 Star Racer were larger in version B compared to version A consistently across task conditions  
 252 (Figure S6A) – both in runs with hard-coded ( $t(40) = -12.84, P < .001$ ) and random star  
 253 positions ( $t(40) = -8.86, P < .001$ ) of the Risk Factors version, as well as the Free Play  
 254 version of Star Racer (i.e., always random star positions;  $t(1539) = -55.935, P < .001$ ). In the  
 255 in-lab validation sample, performance on Star Racer A or B was correlated with completion  
 256 time on the corresponding A or B version of TMT – both when split by condition (Figure  
 257 S6B), as well as when taking into account mean completion time across all 3 runs of Star  
 258 Racer A ( $r(39) = .47, P = .002$ ) and Star Racer B ( $r(39) = .63, P < .001$ ; see Figure S6C).  
 259 Cronbach’s alpha was  $\alpha$  [95% CI] = .82 [.81, .83] for Star Racer A and .77 [.76, .79] for Star  
 260 Racer B, suggesting acceptable to good internal consistency. The test-retest reliability of  
 261 mean completion time was good to moderate ( $r(65) = .87, P < .001$  for Star Racer A,  $r(66)$   
 262 = .72,  $P < .001$  for Star Racer B).  
 263

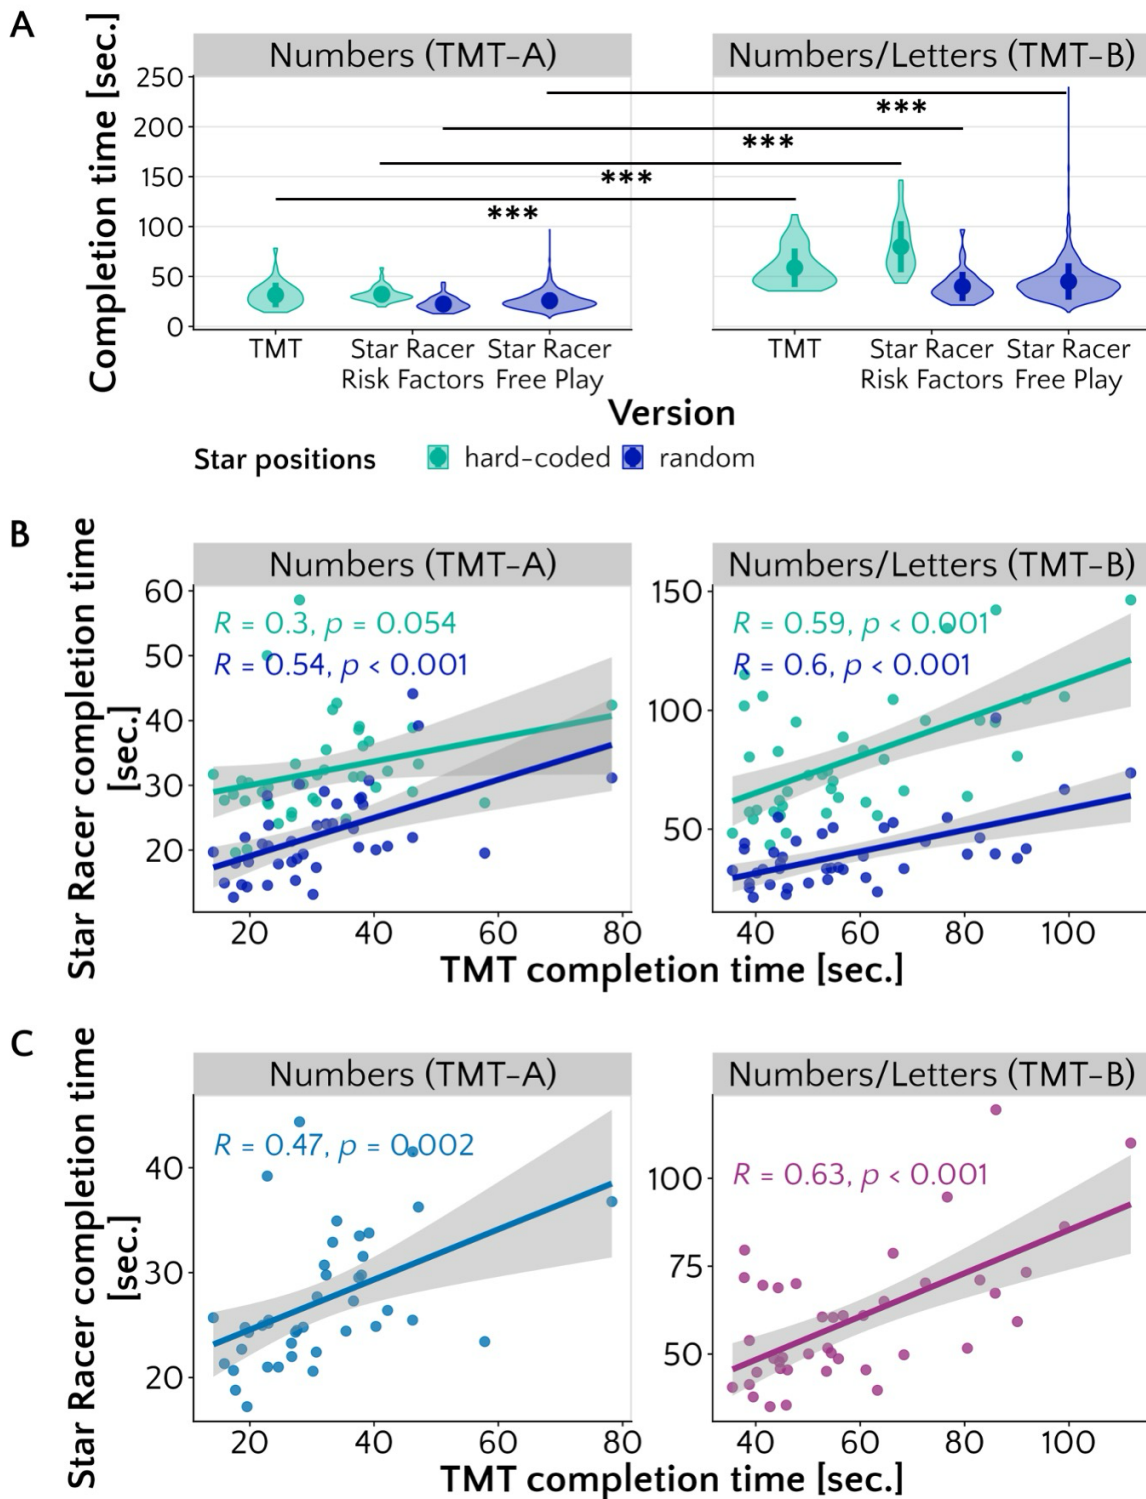

264  
265  
266  
267  
268  
269  
270  
271  
272  
273  
274

**Figure S6. A:** Comparison of completion times on versions A and B in hard difficulty level (25 stars), from left to right: (i) TMT, in-lab sample; (ii) Star Racer in Risk Factors, only runs with hard-coded star positions (i.e., layout directly comparable to TMT), in-lab sample; (iii) Star Racer in Risk Factors, average performance across two runs with random star positions, in-lab sample; (iv) Star Racer in Free Play (where all runs had random star positions), citizen scientist sample. **B:** Correlation between Star Racer and TMT completion times, split by version (A/B) and trial type (hard-coded/random star positions). **C:** Correlation between mean completion time in the Risk Factors version of Star Racer and TMT completion time, split by version (A/B).

## 275 S3B Cannon Blast

276 *Cannon Blast* is a gamified version of the ‘Two-Step Reinforcement Learning Task’.<sup>9</sup> It  
277 includes key elements of the original task’s structure (i.e., drifting rewards, a probabilistic  
278 transition structure), wrapped up in diamond shooting game (see Figure S7). In this game,  
279 users attempt to strike diamonds, which are sometimes moving around the screen or partially  
280 obstructed, by firing from one of two containers on the screen. Each container has a mix of  
281 purple and pink balls; one has 80% pink balls and the other 80% purple, corresponding  
282 directly to the probability that a ball of that colour will be released – this is what we refer to  
283 as ‘task structure’. This means that someone can intentionally choose to increase their  
284 chances of firing a pink or purple ball. Crucially, in this task, some balls explode upon firing  
285 and therefore cannot reach their target. This is not at random, but rather is partially  
286 predictable from the colour of the ball, whereby the chances that a pink/purple ball will  
287 explode drifts slowly and independently over the course of the task. This means that a person  
288 can reduce their chances of getting a bad ball by tracking which ball is currently bad and  
289 choosing the container least likely to produce it. This is the signature of model-based  
290 planning on the task. To operationalise this, data were analysed using a well-established  
291 procedure – using hierarchical logistic regression (HLR) models, which are mixed effects  
292 models implemented with the lme4 package in R.<sup>10</sup> The model tests if participants’ choice  
293 behaviour in the first stage state (coded as switch: 0 and stay: 1, relative to their previous  
294 choice) was influenced by IVs tracking (i) whether that ball was good or bad on the last trial  
295 (coded as bad: -1 and good: 1) and (ii) whether the last trial was a trial where the ball  
296 produced from the container was the one expected by the explicit probability (‘transition’  
297 coded as uncommon: -1 and common: 1), and (iii) their interaction. Within-participants  
298 factors (main effect of reward, transition and their interaction) were modelled as random  
299 effects. Model-based index (MBI) is quantified as the interaction between Reward (good vs.  
300 dud ball) and Transition (common vs uncommon ball colour appearing from the chosen  
301 container). Individual estimates of the MBI were extracted and a single value for each  
302 participant was brought forward for the main analysis.

303 A prior paper validated this task in detail.<sup>1</sup> In brief, there was a moderate positive  
304 association between MBI derived from *Cannon Blast* and the Traditional task ( $r = .40$ ,  $P$   
305  $= .002$ ). Split-half reliability for MBI were high similar for both the traditional ( $r = .81$ , 95%  
306 CI [.70, .88],  $P < .001$ ) and *Cannon Blast* ( $r = .78$ , 95% CI [.66, .87],  $P < .001$ ). The test-  
307 retest reliability was  $r(423) = .63$  assessed over a variable interval (median 4 days).

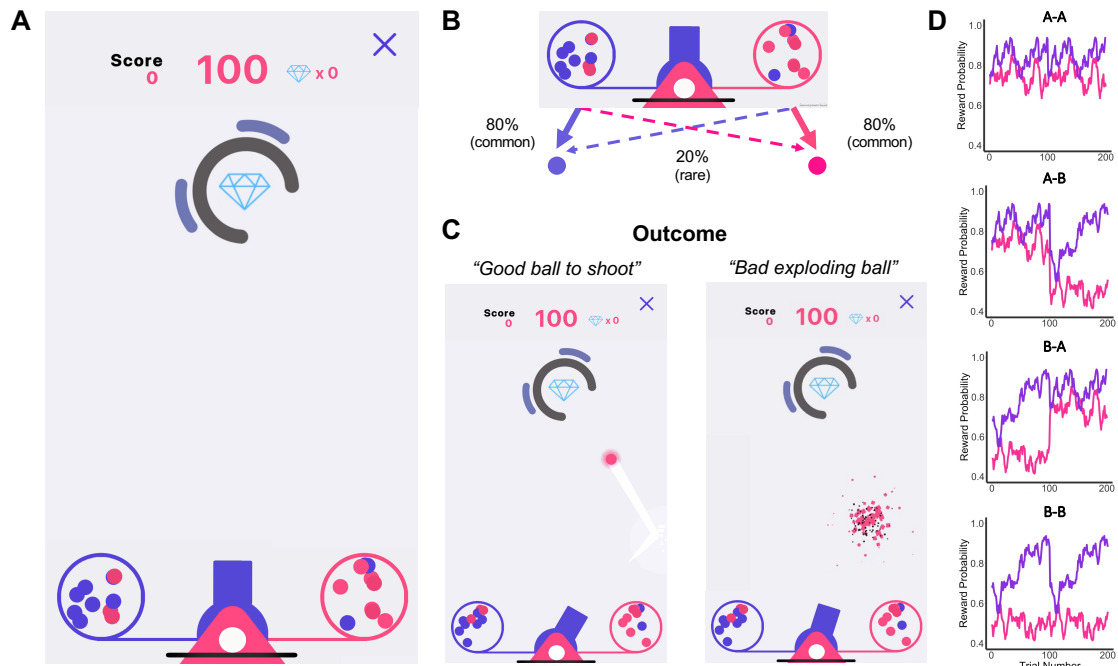

308  
 309 **Figure S7.** Task structure of *Cannon Blast*, a smartphone game to assess model-based planning. A. In this  
 310 game, participants' goal is to shoot as many diamonds as possible before their total number of shots (100  
 311 per block) runs out. To do so, they must aim a central cannon and then select which circular container to  
 312 draw from. B. Purple and pink balls dynamically bounce around each of the flanked containers which  
 313 depict the probability of a pink or purple ball being released. For example, the left container displays 8  
 314 purple balls and releases a purple ball 80% of the time ('common' transition) and displays 2 pink balls,  
 315 giving a pink ball on 20% of trials ('rare' transition). C. The purple and pink balls have different values  
 316 that dynamically change throughout the game. The value of the ball is defined as the probability of it  
 317 being a 'good ball', i.e., one that remains intact after firing (rewarding trial), or a 'dud ball' (non-  
 318 rewarding trial) that explodes shortly after being fired, and therefore cannot reach the diamond. D. We  
 319 included 2 drifting reward probabilities (A, B) that quantitatively differed on various metrics. Participants  
 320 were randomly assigned a reward drift set at each block leading to four distinct drift set combinations (A-  
 321 A, A-B, B-A, B-B). Figure and legend reproduced with permission from Donegan et al.,<sup>1</sup> published in  
 322 *Communications Psychology* under the CC BY 4.0 licence (<https://creativecommons.org/licenses/by/4.0/>).  
 323



## S4: Task structure of Memory Match

A

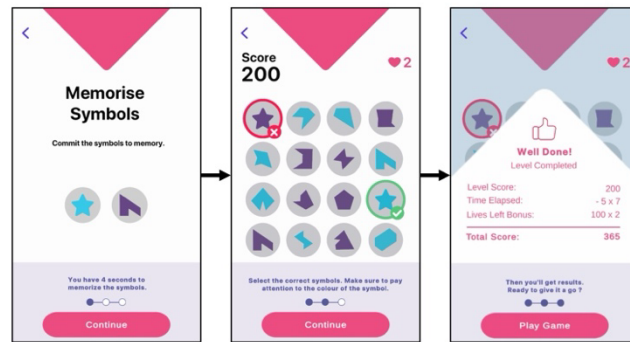

B

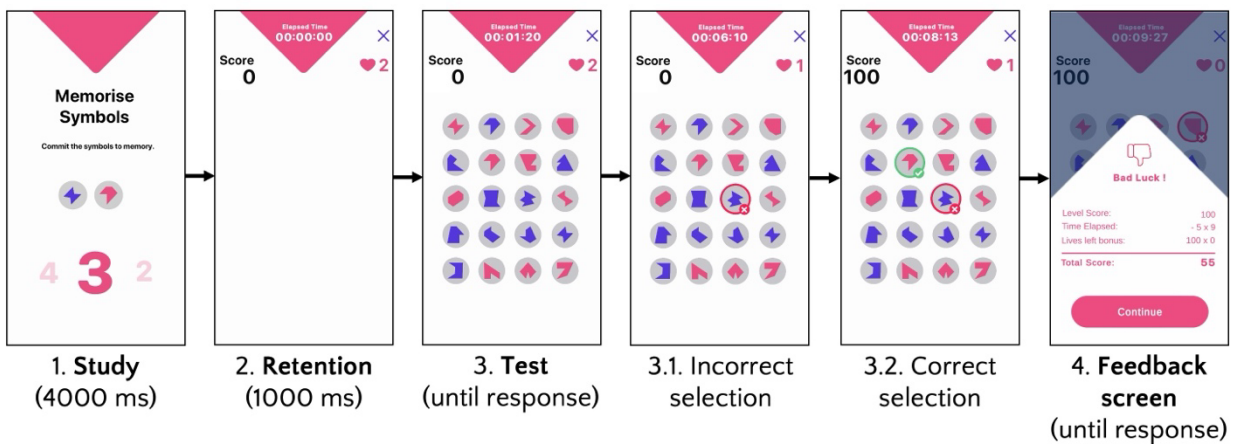

C

| Set size | Binding |         | Non-binding |         |
|----------|---------|---------|-------------|---------|
|          | Shapes  | Letters | Shapes      | Letters |
| 2        |         |         |             |         |
| 3        |         |         |             |         |
| 4        |         |         |             |         |

**Figure S8.** A: Self-paced task instruction screens that appear at the start of Memory Match within the Risk Factors challenge. B: An example trial of Memory Match. The presentation of the study array (1.) is followed by a retention interval (2.) until the test display (3.) fully loads. Participants can lose lives and points by making incorrect selections (3.1.) or earn points by making correct selections (3.2.). Each trial is concluded by a feedback screen (4.). C: Examples of stimuli used in different trial types of Memory Match.



## S5: Task structure of Star Racer

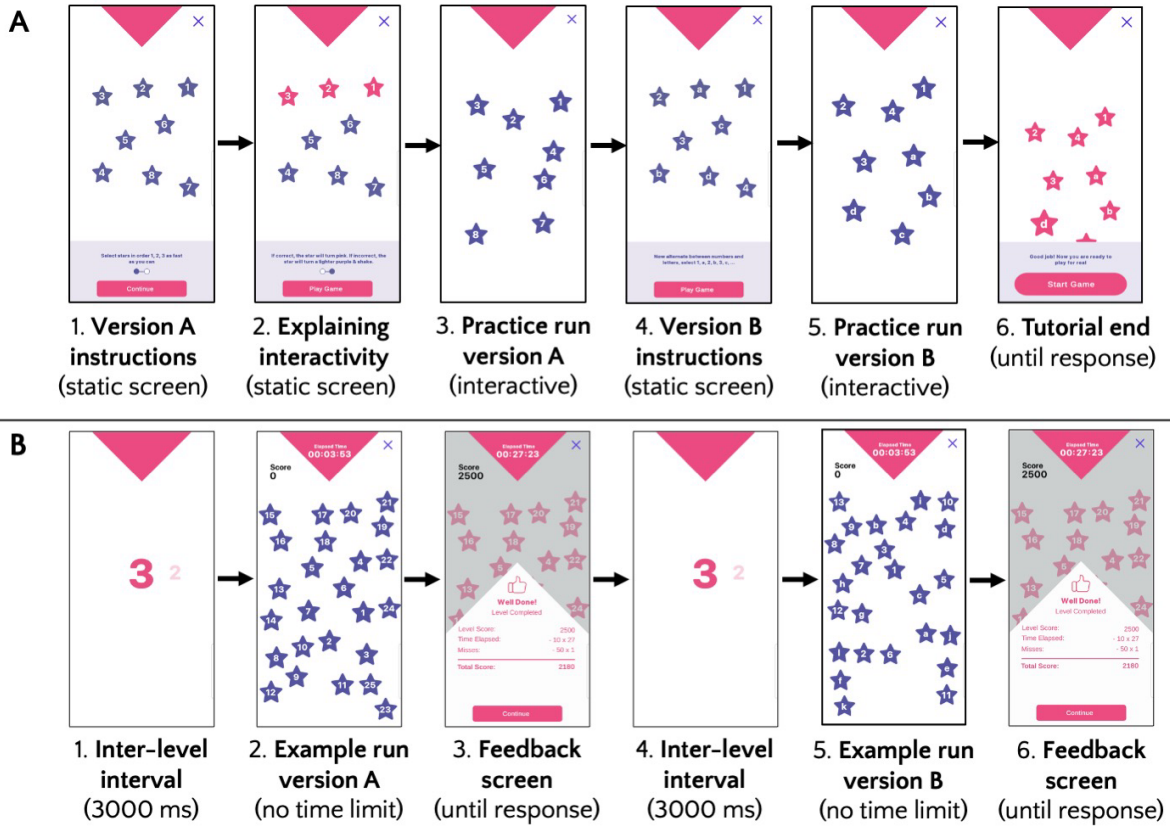

**Figure S9. A:** Self-paced instruction screens and practice runs that appear at the start of Star Racer within the Risk Factors challenge. **B:** Example of Star Racer runs (first A, then B version) with hard-coded star positions.

### S6: Associations between risk factor measures

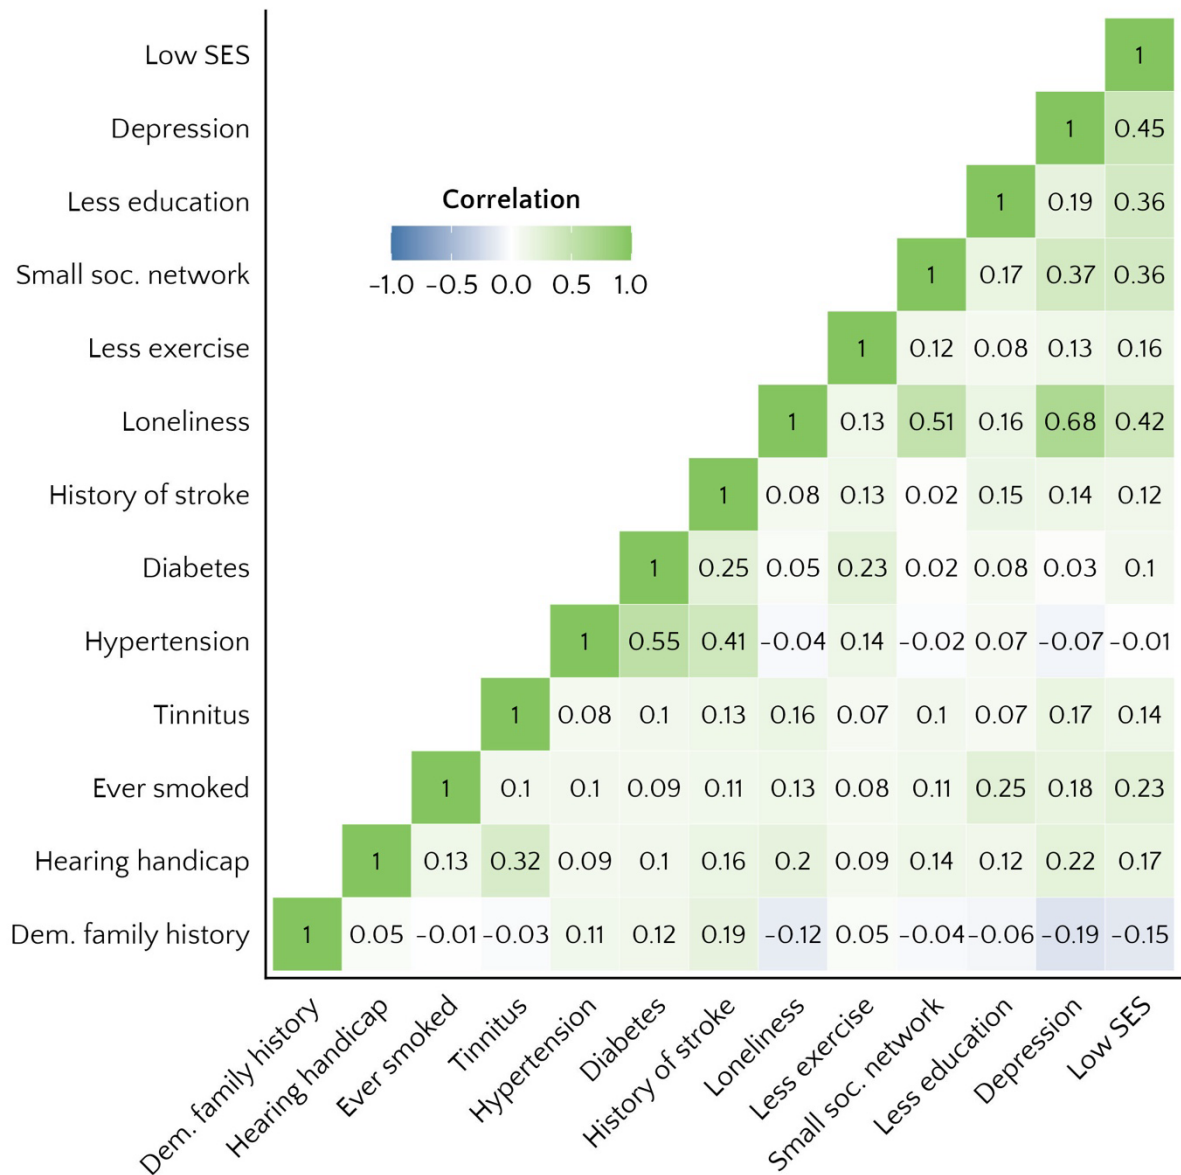

**Figure S10.** Correlation matrix of all biopsychosocial factors assessed in the current study (calculated in the final sample, N = 3,342). Numbers represent Pearson product-moment correlation coefficients for pairs of continuous variables, polyserial correlations for pairs of continuous and categorical variables, and polychoric correlations for pairs of categorical variables.

### S7: Results for non-cisgender participants

Compared to cisgender men, non-cisgender individuals had significantly better visual working memory ( $\beta$  [95% CI] = -0.21 [-0.34, -0.09];  $P = .001$ ; see Figure S11A), cognitive flexibility ( $\beta$  [95% CI] = -0.16 [-0.28, -0.04];  $P = .008$ ; see Figure S11B), and model-based planning ( $\beta$  [95% CI] = -0.14 [-0.26, -0.02];  $P = .028$ ; see Figure S11C), but also a significantly higher likelihood to report subjective memory problems (OR [95% CI] = 1.64, [1.28, 2.12],  $P < .001$ ; see Figure S11D).

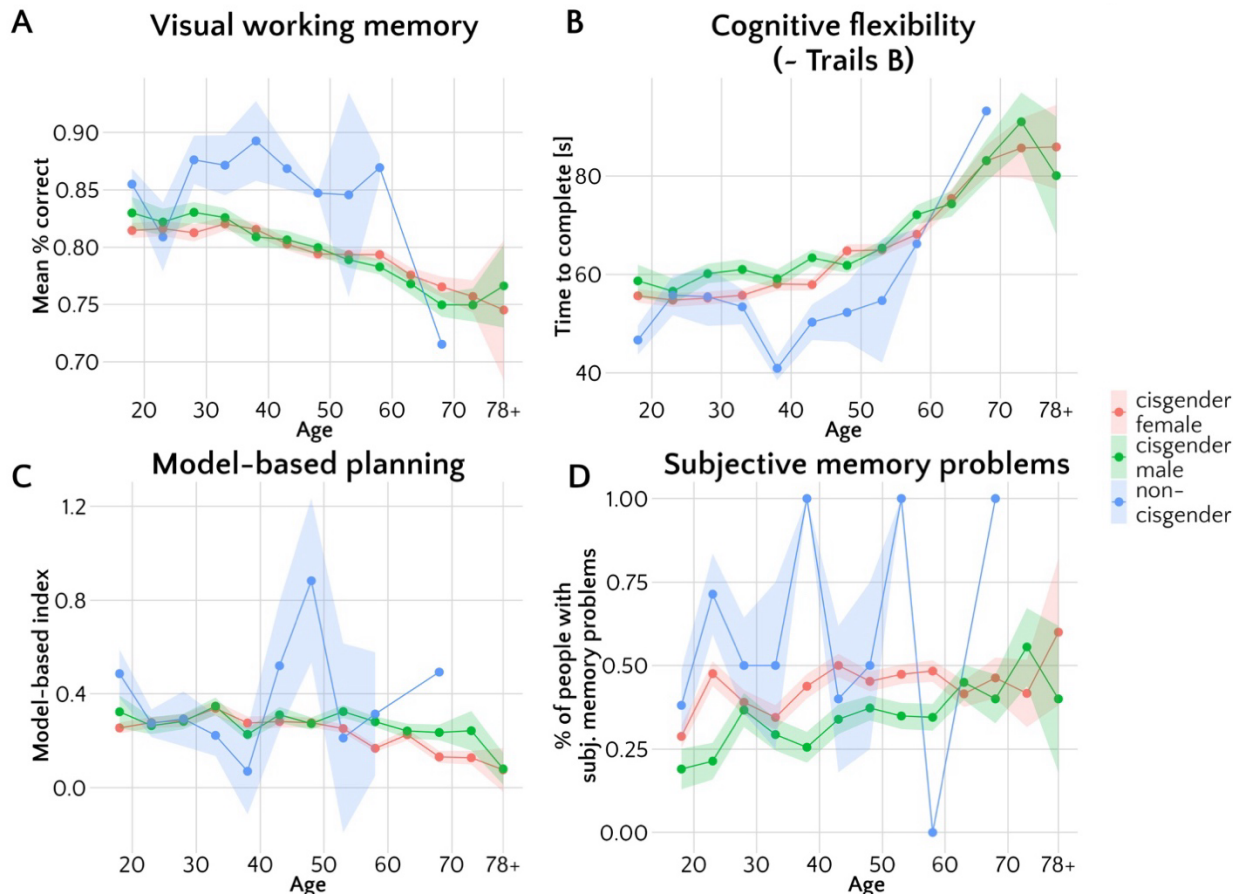

**Figure S11.** Associations of cognitive measures with age and gender, including cisgender females and males and “non-cisgender” participants (i.e., participants who identified as either non-binary, transgender female, or transgender male). Points correspond to mean raw scores on (A) visual working memory, (B) cognitive flexibility, (C) model-based planning, and (D) mean proportion of participants with memory problems. The means were calculated per 5-year bins, split by gender. Error bars represent standard errors (A–C) or standard errors of proportion (D). Note that due to the very small number of non-cisgender participants ( $n = 67$ , i.e., 2% of the total sample), not all age groups were represented and calculating means or standard errors was not always possible

### S8: Comparison of effect magnitude for subjective vs. objective cognition

**Table S1.**

*Associations of risk factors with binarized cognitive outcomes (n = 3,327), controlling for gender and age, expressed as estimates from logistic regressions for all DVs. Highlights indicate results significant after Bonferroni correction (P < 0.0038).*

| Risk factor         | Visual working memory    |                  | Cognitive flexibility (~ Trails B) |                  | Model-based planning    |                  | Subjective memory problems |                  |
|---------------------|--------------------------|------------------|------------------------------------|------------------|-------------------------|------------------|----------------------------|------------------|
|                     | OR [CI <sub>95%</sub> ]  | P                | OR [CI <sub>95%</sub> ]            | P                | OR [CI <sub>95%</sub> ] | P                | OR [CI <sub>95%</sub> ]    | P                |
| Depression          | <b>1.28 [1.18, 1.38]</b> | <b>&lt; .001</b> | <b>1.16 [1.07, 1.25]</b>           | <b>&lt; .001</b> | 1.05 [0.98, 1.14]       | .166             | <b>1.82 [1.68, 1.97]</b>   | <b>&lt; .001</b> |
| Low SES             | <b>1.14 [1.06, 1.23]</b> | <b>&lt; .001</b> | 1.11 [1.03, 1.2]                   | .005             | 1.11 [1.03, 1.19]       | .005             | <b>1.65 [1.53, 1.78]</b>   | <b>&lt; .001</b> |
| Hearing handicap    | 1.04 [0.97, 1.11]        | .327             | 1.07 [0.99, 1.15]                  | .068             | 0.96 [0.89, 1.03]       | .236             | <b>1.59 [1.47, 1.71]</b>   | <b>&lt; .001</b> |
| Loneliness          | <b>1.12 [1.04, 1.2]</b>  | <b>.003</b>      | 1.09 [1.01, 1.17]                  | .028             | 1.02 [0.95, 1.1]        | .500             | <b>1.52 [1.41, 1.64]</b>   | <b>&lt; .001</b> |
| Less education      | <b>1.33 [1.24, 1.43]</b> | <b>&lt; .001</b> | <b>1.18 [1.09, 1.27]</b>           | <b>&lt; .001</b> | <b>1.2 [1.12, 1.29]</b> | <b>&lt; .001</b> | <b>1.39 [1.3, 1.5]</b>     | <b>&lt; .001</b> |
| Less exercise       | 1.03 [0.96, 1.11]        | .357             | 1.06 [0.98, 1.14]                  | .147             | 1.01 [0.94, 1.08]       | .761             | <b>1.41 [1.31, 1.52]</b>   | <b>&lt; .001</b> |
| Ever smoked         | <b>1.14 [1.05, 1.22]</b> | <b>.001</b>      | 1.08 [1, 1.17]                     | .039             | 1.07 [1, 1.15]          | .067             | <b>1.33 [1.24, 1.44]</b>   | <b>&lt; .001</b> |
| Tinnitus            | 1.02 [0.94, 1.1]         | .609             | 1 [0.93, 1.08]                     | .971             | 0.92 [0.85, 0.99]       | .037             | <b>1.33 [1.23, 1.43]</b>   | <b>&lt; .001</b> |
| Small soc. network  | 1.1 [1.02, 1.18]         | .012             | 1.08 [1.01, 1.16]                  | .032             | 1.04 [0.97, 1.12]       | .232             | <b>1.27 [1.18, 1.36]</b>   | <b>&lt; .001</b> |
| History of stroke   | 1.32 [0.98, 1.81]        | .074             | 1.63 [1.18, 2.33]                  | .004             | 1.08 [0.8, 1.45]        | .614             | <b>1.84 [1.34, 2.6]</b>    | <b>&lt; .001</b> |
| Dem. family history | 0.98 [0.89, 1.08]        | .663             | 0.95 [0.86, 1.05]                  | .305             | 0.99 [0.9, 1.09]        | .893             | 1.12 [1.01, 1.23]          | .024             |
| Diabetes            | 1.21 [1.04, 1.42]        | .014             | 1.16 [0.99, 1.35]                  | .072             | 0.97 [0.83, 1.13]       | .678             | 1.18 [1.01, 1.38]          | .035             |
| Hypertension        | <b>1.17 [1.06, 1.29]</b> | <b>.002</b>      | 1.06 [0.96, 1.17]                  | .244             | 1.06 [0.96, 1.18]       | .217             | 1.08 [0.97, 1.19]          | .146             |

### S9: Smoking history x age interaction

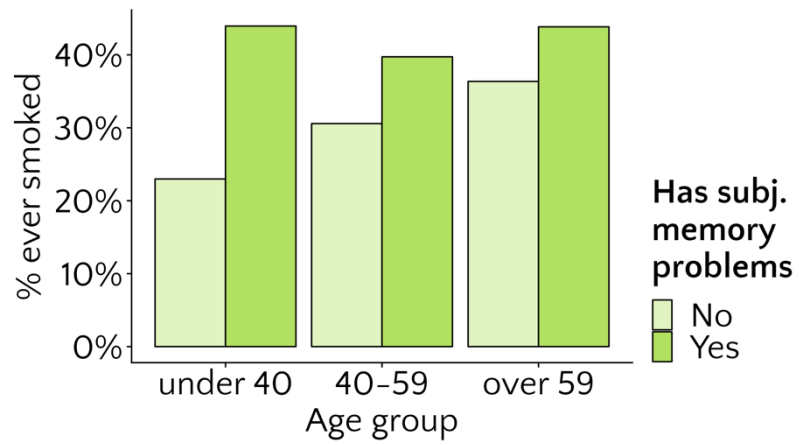

**Figure S12.** Associations of smoking with subjective memory problems modified by age. For plotting purposes, age was grouped into three categories: young adults (under 40; n = 1,563), middle aged adults (40–59; n = 1,136), and older adults (over 59; n = 628).

### S10: Interactions between age and risk factors

**Table S2.**

*Interactions of risk factors with age, regressed on cognitive outcomes, controlling for gender and age (n = 3,327). Estimates come from logistic regressions (subj. memory problems) or linear regressions (all other DVs). Highlights indicate significance at P < 0.0015.*

| <b>Cognitive outcome</b>           | <b>Interaction</b>       | <b><math>\beta</math> (SE)</b> | <b>t/z</b> | <b>P</b> | <b>OR [95% CI]</b> |
|------------------------------------|--------------------------|--------------------------------|------------|----------|--------------------|
| Visual working memory              | Age * Small soc. network | -0.04 (0.02)                   | -2.50      | .013     | N/A                |
|                                    | Age * Low SES            | -0.04 (0.02)                   | -2.27      | .023     | N/A                |
|                                    | Age * Loneliness         | -0.05 (0.02)                   | -2.63      | .009     | N/A                |
|                                    | Age * Less education     | -0.02 (0.02)                   | -1.34      | .180     | N/A                |
|                                    | Age * Hypertension       | 0 (0.03)                       | -0.06      | .950     | N/A                |
|                                    | Age * History of stroke  | -0.13 (0.07)                   | -1.92      | .055     | N/A                |
|                                    | Age * Ever smoked        | 0 (0.02)                       | -0.15      | .879     | N/A                |
|                                    | Age * Diabetes           | -0.09 (0.05)                   | -1.74      | .083     | N/A                |
|                                    | Age * Depression         | -0.02 (0.02)                   | -1.17      | .241     | N/A                |
| Cognitive flexibility (~ Trails B) | Age * Small soc. network | -0.02 (0.02)                   | -1.22      | .221     | N/A                |
|                                    | Age * Low SES            | 0 (0.02)                       | 0.20       | .839     | N/A                |
|                                    | Age * Loneliness         | -0.04 (0.02)                   | -2.40      | .016     | N/A                |
|                                    | Age * Less education     | -0.02 (0.02)                   | -0.93      | .350     | N/A                |
|                                    | Age * Hypertension       | 0.06 (0.03)                    | 2.08       | .037     | N/A                |
|                                    | Age * History of stroke  | -0.08 (0.07)                   | -1.17      | .244     | N/A                |
|                                    | Age * Hearing handicap   | 0.01 (0.02)                    | 0.40       | .687     | N/A                |
|                                    | Age * Ever smoked        | 0.02 (0.02)                    | 0.95       | .343     | N/A                |
|                                    | Age * Depression         | -0.04 (0.02)                   | -2.28      | .023     | N/A                |
| Model-based planning               | Age * Low SES            | 0 (0.02)                       | 0.08       | .935     | N/A                |
|                                    | Age * Less education     | -0.03 (0.02)                   | -1.56      | .118     | N/A                |
|                                    | Age * Depression         | -0.02 (0.02)                   | -1.31      | .189     | N/A                |
| Subjective memory problems         | Age * Tinnitus           | -0.06 (0.04)                   | -1.60      | .110     | 0.94 [0.87, 1.01]  |
|                                    | Age * Small soc. network | -0.07 (0.04)                   | -1.96      | .050     | 0.93 [0.86, 1]     |
|                                    | Age * Low SES            | -0.05 (0.04)                   | -1.28      | .200     | 0.95 [0.88, 1.03]  |
|                                    | Age * Loneliness         | -0.01 (0.04)                   | -0.37      | .712     | 0.99 [0.92, 1.06]  |
|                                    | Age * Less exercise      | -0.03 (0.04)                   | -0.88      | .380     | 0.97 [0.89, 1.04]  |
|                                    | Age * Less education     | -0.07 (0.04)                   | -1.90      | .057     | 0.93 [0.86, 1]     |

| <b>Cognitive outcome</b> | <b>Interaction</b>       | <b><math>\beta</math> (SE)</b> | <b><i>t/z</i></b> | <b><i>P</i></b>  | <b>OR [95% CI]</b>       |
|--------------------------|--------------------------|--------------------------------|-------------------|------------------|--------------------------|
|                          | Age * History of stroke  | -0.01 (0.15)                   | -0.09             | .932             | 0.99 [0.73, 1.34]        |
|                          | Age * Hearing handicap   | -0.1 (0.04)                    | -2.65             | .008             | 0.9 [0.84, 0.97]         |
|                          | <b>Age * Ever smoked</b> | <b>-0.14 (0.04)</b>            | <b>-3.65</b>      | <b>&lt; .001</b> | <b>0.87 [0.81, 0.94]</b> |
|                          | Age * Depression         | 0.03 (0.04)                    | 0.87              | .386             | 1.03 [0.96, 1.12]        |

## References

1. Donegan KR, Brown VM, Price RB, et al. Using smartphones to optimise and scale-up the assessment of model-based planning. *Commun Psychol*. 2023;1(1):1-15. doi:10.1038/s44271-023-00031-y
2. Parra MA, Abrahams S, Logie RH, Méndez LG, Lopera F, Della Sala S. Visual short-term memory binding deficits in familial Alzheimer's disease. *Brain*. 2010;133(9):2702-2713. doi:10.1093/brain/awq148
3. Bowie CR, Harvey PD. Administration and interpretation of the Trail Making Test. *Nat Protoc*. 2006;1(5):2277-2281. doi:10.1038/nprot.2006.390
4. Brockmole JR, Parra MA, Sala SD, Logie RH. Do binding deficits account for age-related decline in visual working memory? *Psychonomic Bulletin & Review*. 2008;15(3):543-547. doi:10.3758/PBR.15.3.543
5. Killin L, Abrahams S, Parra MA, Della Sala S. The effect of age on the FCSRT-IR and temporary visual memory binding. *Int Psychogeriatr*. 2018;30(3):331-340. doi:10.1017/S104161021700165X
6. Parra MA, Della Sala S, Logie RH, Morcom AM. Neural correlates of shape-color binding in visual working memory. *Neuropsychologia*. 2014;52:27-36. doi:10.1016/j.neuropsychologia.2013.09.036
7. Psychology Software Tools Inc. E-Prime. Published online 2012.
8. Tombaugh TN. Trail Making Test A and B: normative data stratified by age and education. *Arch Clin Neuropsychol*. 2004;19(2):203-214. doi:10.1016/S0887-6177(03)00039-8
9. Daw ND, Gershman SJ, Seymour B, Dayan P, Dolan RJ. Model-Based Influences on Humans' Choices and Striatal Prediction Errors. *Neuron*. 2011;69(6):1204-1215. doi:10.1016/j.neuron.2011.02.027
10. Bates D, Mächler M, Bolker B, Walker S. Fitting Linear Mixed-Effects Models Using lme4. *Journal of Statistical Software*. 2015;67:1-48. doi:10.18637/jss.v067.i01
